# Supplementary material for: Stereodynamical Control of Nonadiabatic Quenching Dynamics of OH(A2S+) by H2: Full-Dimensional Quantum Dynamics
Source: Research Square preprint supplement (doi:10.21203/rs.3.rs-129574/v1), 2021-01-12
Supplement: Supplementary file 1 [file ad625bb49dd6a11df4eea177.docx]

**Supporting information for**

Stereodynamical Control of Nonadiabatic Quenching Dynamics of OH(A2+) by H2: Full-Dimensional Quantum Dynamics

Bin Zhao,1,2,* Shanyu Han,1 Christopher L. Malbon,3 Uwe Manthe,2 David. R. Yarkony,3 and Hua Guo1,*

*1Department of Chemistry and Chemical Biology, University of New Mexico, Albuquerque, New Mexico, 87131, USA*

*2Theoretische Chemie, Fakultät für Chemie, Universität Bielefeld, Universitätsstraße 25, D-33615 Bielefeld, Germany*

*3Department of Chemistry, Johns Hopkins University, Baltimore Maryland 21218, USA*

Contents

[**I. Quantum wave packet method** S2](#_Toc58974018)

[*I.1 Hamiltonian and basis representation* S2](#_Toc58974019)

[*I.2 Initial state, time propagation, and analysis* S2](#_Toc58974020)

[**II. Trajectory surface hopping method** S5](#_Toc58974021)

[**III Additional results** S6](#_Toc58974022)

[*III.1 Movies: nonadiabatic transitions in real-time, animated view of 2D PESs, and evolution of wave packet on the 32A state* S6](#_Toc58974023)

[*III.2 Tables: critical features on the DPEM, parameters of quantum calculations, and symmetry properties of the DPEM.* S7](#_Toc58974024)

[*III.3 Figures: features of the DPEM, final-state distribution in the (in)elastic channel, the geometry of nonadiabatic transitions in TSH calculation, reaction probability on the adiabatic PES, etc.* S10](#_Toc58974025)

# **I. Quantum wave packet method**

## *I.1 Hamiltonian and basis representation*

The Hamiltonian and basis functions for diatom-diatom systems have been defined in detail before, for example, in Ref. [1](#_ENREF_1). Here only a brief description is given. As shown in Figure 1(c), the H2+OH Jacobi coordinates are denoted as . The Hamiltonian in the diabatic representation reads:

, (S1)

where **I**4 is a 4×4 identity matrix, and the elements of the symmetric diabatic potential energy matrix depend on the six internal coordinates, i.e. , *n*,*m*=1,2,3,4. The kinetic energy operator for *Ntot*=0 (=1 hereafter) is

, (S2)

where , , and are the reduced masses for the three radial Jacobi coordinates , , and , respectively; and are the rotational angular momentum operators of H2 and OH, respectively, and . is the conserved total nuclear angular momentum operator of the system and is restricted to be zero in the present work.

The wave packet is represented in the diabatic representation as

, (S3)

where is the wave packet components in *e*-th diabatic electronic state.

The Hamiltonian and wave functions were represented with the finite basis representation (FBR) in the diatom-diatom Jacobi coordinates, and the action of the diabatic potential energy operator was evaluated on the discrete variable representation (DVR) grid.[2](#_ENREF_2) The sparse transformation between the FBR and DVR allows an efficient propagation of the wave packets.[2](#_ENREF_2)

## *I.2 Initial state, time propagation, and analysis*

The initial wave packet is prepared in the OH(A2+)+H2 asymptote on the adiabatic PES as a product of a Gaussian wave packet, , and the ro-vibrational states of H2 and OH, and , respectively. is chosen to be

, (S4)

where , , and are the central position, width, and momentum of the initial Gaussian wave packet, respectively. Before the propagation, the initial wave packet is transformed to the diabatic representation,

, (S5)

where is the transformation matrix between diabatic and adiabatic representations.

The wave packets were then propagated simultaneously on the four diabatic surfaces using a second-order split-operator scheme.[3](#_ENREF_3) is independently operated onto each diabatic wave packet, but the operation of needs to be performed in the adiabatic representation in which the potential energy operator is diagonal. Thus, the wave packet is first transformed to the adiabatic representation and then transformed back to the diabatic representation after the operation of .

Negative imaginary absorbing potentials were used to prevent wave functions from reaching grid edges. The wave packets on different states may have different kinetic energies along *R* so that an imaginary absorption potential with two segments was used in the *R* coordinate,

(S6)

Here the parameters for the first segment in were selected to remove wave function components with small kinetic energies and the second one in for the ones with large kinetic energies, i.e. the ones after the non-reactive quenching. The absorbing potential in the coordinate used only one segment. Detailed parameters for the absorbing potentials are listed in Table S2.

The total reactive quenching probability was calculated via a flux analysis in the product channel on a dividing surface at ,

, (S7)

where ’s are the diabatic scattering wave functions at the energy *E*, which is calculated by a Fourier transform of the corresponding time-dependent wave packet,

. (S8)

The coefficient is the energy component of the initial wave packet. Similarly, a flux analysis in the *R* coordinate was performed on a dividing surface in the asymptotic region (). Probabilities for non-reactive quenching and (in)elastic scattering were calculated in the adiabatic representation so that the diabatic scattering wave functions ’s need to be transformed to the adiabatic representation, . To this end, the (in)elastic scattering probability is obtained as

, (S9)

and the non-reactive quenching probability is obtained as

, (S10)

where the terms with and correspond to the quenching probabilities for the OH(X2(A”)) and OH(X2(A’)) components, respectively.

Final state analysis for the non-reactive quenching was performed on the dividing plane at . To resolve the final state information, a projector onto one of the final states, , was inserted in the bracket in Eqn. (S10). A similar procedure was used to extract the final state distributions for the (in)elastic channel.

# **II. Trajectory surface hopping method**

In addition to the quantum dynamics calculations, we have also carried out trajectory surface hopping (TSH) calculations in the adiabatic representation using the ANT (Adiabatic and Nonadiabatic Trajectory) package of Truhlar and coworkers.[4](#_ENREF_4) In this case, trajectories corresponding to the ro-vibrational ground states of the OH(A) and H2 reactants were sampled using the harmonic oscillator approximation. For all three collisional energies, calculations were performed with the impact parameter *b* fixed to zero; while for 0.05 eV, calculations were also done for all impact parameters with *b*max = 5.5 Å. The trajectories were propagated by solving the Hamilton’s equation in the adiabatic representation. The trajectories are terminated when the separation between the products is larger than 5 Å. Near the conical intersection seam, the trajectory is allowed to make a hop from one electronic state to another, using the fewest switch method of Tully,[5](#_ENREF_5) with the time uncertainty method[6](#_ENREF_6) combined with stochastic decoherence.[7](#_ENREF_7) About 15000 trajectories were calculated for each collisional energy. The branching ratio is determined by *ni*/*ntot*, where *ni* is the number of trajectories end in channel *i*(*i* refers to R1a, R1b, and R1c channels) and *ntot* is the number. Since the electronic character is ill-defined in the adiabatic representation, the A′ and A′′ branching of the OH(X) product was not distinguished in the TSH calculations.

# **III Additional results**

## *III.1 Movies: nonadiabatic transitions in real-time, animated view of 2D PESs, and evolution of wave packet on the 32A state*

Movie S1 depicts the evolution of the time-dependent adiabatic wave packets on the 12A, 22A, and 32A states. The two-dimensional (2D) probability densities in the H-H and the OH-H2 distances were obtained by integrating all other four coordinates. As the movie shows, the wave packet initially moves on the 32A state (panel (c)), and nonadiabatic transitions occur when it reaches the regions of the C∞v conical intersection seam, where transitions to the 12A and 22A states occur almost at the same time. On the 12A state (panel (a)), the wave packet subsequently branches into the reactive and non-reactive quenching channels; the wave packet on the 22A state (panel (b)) can only reach the non-reactive channel. In the 2D plots in H2 and OH rotational angles, nonadiabatic transitions to the 12A and 22A states occur preferentially near the co-linear geometry ( and ).

Movies S2 provides an animated view of 2D cuts of the adiabatic PESs near the 32A-22A CI seam. In panel (a), the cut along the and coordinates displays a continuous seam that connects the C∞v CI to the C2v ones. The C∞v MEX is the global minimum on that seam. In panel (b), the cut along the and coordinates displays a steep slope away from the intersections. The reference geometry is selected as the C∞v MEX in Table S1.

Movie S3 shows the initial wave packet, prepared in the ground ro-vibrational state of OH and H2, has equal probability density on the plane (The Gauss-Legendre quadrature weights are removed). When OH approaches H2, the interaction force rotates H2 and OH to three preferable structures: a T-shaped OH-H2 structure ( and ) and two linear structures ( and ). A representative snapshot of Movie S3 is shown in Figure S8. The T-shaped one has the H end of OH points to H2 and corresponds to a van der Walls (vdW) well – with a depth of 0.34 eV. The well starts to attract OH and H2 into the well even at a large OH-H2 distance (see Figure S1). If OH approaches H2 slowly, most of the wave packet ends up in the well. When OH-H2 distance reaches around 5.0 a.u., a significant barrier appears, which separates the approach of the H and O sides of OH to H2. The part with the O side of OH facing H2 reaches the region with strong nonadiabatic couplings. The wave packet accumulates near the two linear structures in the vicinity of the C∞v MEXs; Interestingly, no noticeable wave packet is seen near the C2v MEXs. To this end, the picture becomes clear that the wave function always evolves to the local minima on the surface, i.e., the vdW well and the C∞v MEXs.

## *III.2 Tables: critical features on the DPEM, parameters of quantum calculations, and symmetry properties of the DPEM.*

Table S1 lists the geometries and energies of some critical features of the DPEM.[8](#_ENREF_8) The geometries of the three MEXs are used as the reference geometries in Figures 1, 6, S2, and S5.

Table S2 provides the parameters used in the wave packet calculations. The long propagation time of 30, 000 a.u. is to converge the quantities at the small collision energy of 0.05 eV, especially for the one in the (in)elastic channel. We point out that only four basis functions are used to describe the OH vibration, and this model does not consider the insertion mechanism. Early experimental investigation on the collision of OH with D2 ruled out the contribution of the insertion mechanism in the non-reactive quenching channel.[9](#_ENREF_9)

The character table of the G4 (C2v) CNPI subgroup in Table S3 and the symmetry properties of the DPEM elements in Table S4 are used to explain the exclusive population of the *ortho*-H2 product.

**Table S1. Geometries and energies of critical features on the DPEM**[8](#_ENREF_8) **(Energy in eV, radial coordinates in the unit of Bohr, and angular ones in degree).**

|  |  |  |  |  |  |  |  |
| --- | --- | --- | --- | --- | --- | --- | --- |
| 22A–32A (C∞v MEX) | -1.934 | 1.776 | 1.820 | 3.258 | 0 | 0 | 0 |
| 22A–32A (C2v MEX) | -1.281 | 1.601 | 1.841 | 2.862 |  | 0 | 0 |
| 12A–22A (C2v MEX) | -1.326 | 1.618 | 1.841 | 2.832 |  | 0 | 0 |
| OH-H2 vdW (32A) | -0.344 | 1.461 | 1.975 | 4.125 |  |  | 0 |
| OH+H2 (12A) | -4.141 | 1.406 | 1.825 |  |  |  |  |
| OH+H2 (32A) | 0.000 | 1.402 | 1.901 |  |  |  |  |

**Table S2. Parameters used in the quantum calculations (Atomic units are used if not otherwise stated)**

| Initial wave packet | | | | | | |
| --- | --- | --- | --- | --- | --- | --- |
|  | 11.0 | | | | | |
|  | 0.35 | | | | | |
|  | with =0.15 eV | | | | | |
| Basis set sizes | | | | | | |
|  | (0.1,16.0), =160, =458 | | | | | |
|  | (0.7,5.0), =36, =16 | | | | | |
|  | (0.7,5.0), =4 | | | | | |
|  | (0,45) | | | | | |
|  | (0,40) | | | | | |
| Absorbing Potential | | | | | | |
|  |  |  |  |  | **/** |  |
|  | 3.0 | 0.0025 | 0.3 | 10.5 | 14.5 | 16.0 |
|  | 3.0 | 3.0 | 0.2 | 4.0 | 5.0 |  |
| Propagation time/step: 30000.0/10.0 | | | | | | |
| flux plane: 3.2 | | | | | | |
| flux plane: 10.0 | | | | | | |

**Table S3. Character table of the G4 (C2v) CNPI subgroup.**

| irrep. |  |  |  |  |
| --- | --- | --- | --- | --- |
| A1 | 1 | 1 | 1 | 1 |
| A2 | 1 | 1 | -1 | -1 |
| B1 | 1 | -1 | 1 | -1 |
| B2 | 1 | -1 | -1 | 1 |

**Table S4. Symmetry properties of the elements in the diabatic potential energy matrix.**a

|  | D1(A1) | D2(B2) | D3(B1) | D4(A1) |
| --- | --- | --- | --- | --- |
| D1(A1) | A1 | B2 | B1 | A1 |
| D2(B2) |  | A1 | A2 | B2 |
| D3(B1) |  |  | A1 | B1 |
| D4(A1) |  |  |  | A1 |

aIn the H2+OH asymptote, the D2 and D3 diabatic states correspond to the A′′ and A′ states of the H2+OH(X2) channel, respectively, while the D1 and D4 ones are coupled for the H2+OH(A2+) channel.[8](#_ENREF_8)

## *III.3 Figures: features of the DPEM, final-state distribution in the (in)elastic channel, the geometry of nonadiabatic transitions in TSH calculation, reaction probability on the adiabatic PES, etc.*

In Figure S1, the one-dimensional plots of the adiabatic 32A state surface display the anisotropy that separates the approach of the H side of OH to H2 from the O side. In panel (a), the vdW well already shows a significant gradient at large *R* values, and it efficiently attracts wave packet to the well. In panel (b), a barrier that separates the O side from the H side of OH is developed during its approach to H2. The barrier is high enough that the wave packet can not access the CI once it moves to the vdW region. If the H side OH faces H2, the wave packet moves to the vdW well; otherwise, the wave packet reaches the CI and makes nonadiabatic transitions to the 12A and 22A states.

Figure S2 shows the OH(A) and H2 rotational state-resolved probabilities in the (in)elastic channel at three collision energies. No vibrational excitation in OH(A) and H2 appears at all the three collision energies. The rotational excitation is minor and increases at higher collision energy. Due to symmetry, only *para*-H2 states emerge.

Figure S3 shows the hopping geometry distribution for the 32A-22A transitions in the TSH calculations at 0.05 eV. The hopping is clustered near collinear geometries, much like that in Figure 4 of the main text.

Figure S4 shows the anisotropy on the 32A state PES that exerts a torque on the H2 to guide it into the C∞v CI rather than the C2v one.

Figure S5 shows 1D cuts in the same way as in Figure 5 of the main text except that the reference geometries are chosen at the 22A-32A(C2v) and 12A-22A(C2v) MEXs (see Table S1). Similar anisotropy on the 12A and 22A state PESs is observed along the OH and H2 rotational angles.

Figure S6 shows the reaction probability of the OH(X) + H2 🡪 H2O + H reaction on the ground adiabatic state PES obtained from the DPEM. The comparison with the result obtained on the most accurate CXXZ PES[10](#_ENREF_10) is quite reasonable, although the barrier on the DPEM seems to be overestimated somewhat. This agreement confirmed the accuracy of the ground state PES provided by the current DPEM and suggested that the excited state PESs should be of comparable accuracy.

In Figure S7, populations of the three adiabatic states, defined as the norm of their respective wave packets, are plotted as a function of time. It is clear that following the initial nonadiabatic transitions, the populations of the 12A and 22A states start to appear. If only planar geometries were considered, the 22A(A′) and 32A(A′) states would have no coupling with the 12A(A′′) state. Products of the non-reactive quenching process would thus appear only in the A′ state of OH(X). A CI between these two states leads to both the A’ and A” components of the OH(X2) product. However, the coupling is not strong enough to yield a statistical distribution for the -doublet.

Figure S8 is one snapshot of Movie S3 at a propagation time of 4, 000 a.u. when the wave packet on the 32A state PES shows three preferable structures: a T-shaped OH-H2 vdW structure ( and ) and two linear structures ( and ) corresponding to the C∞v CI.


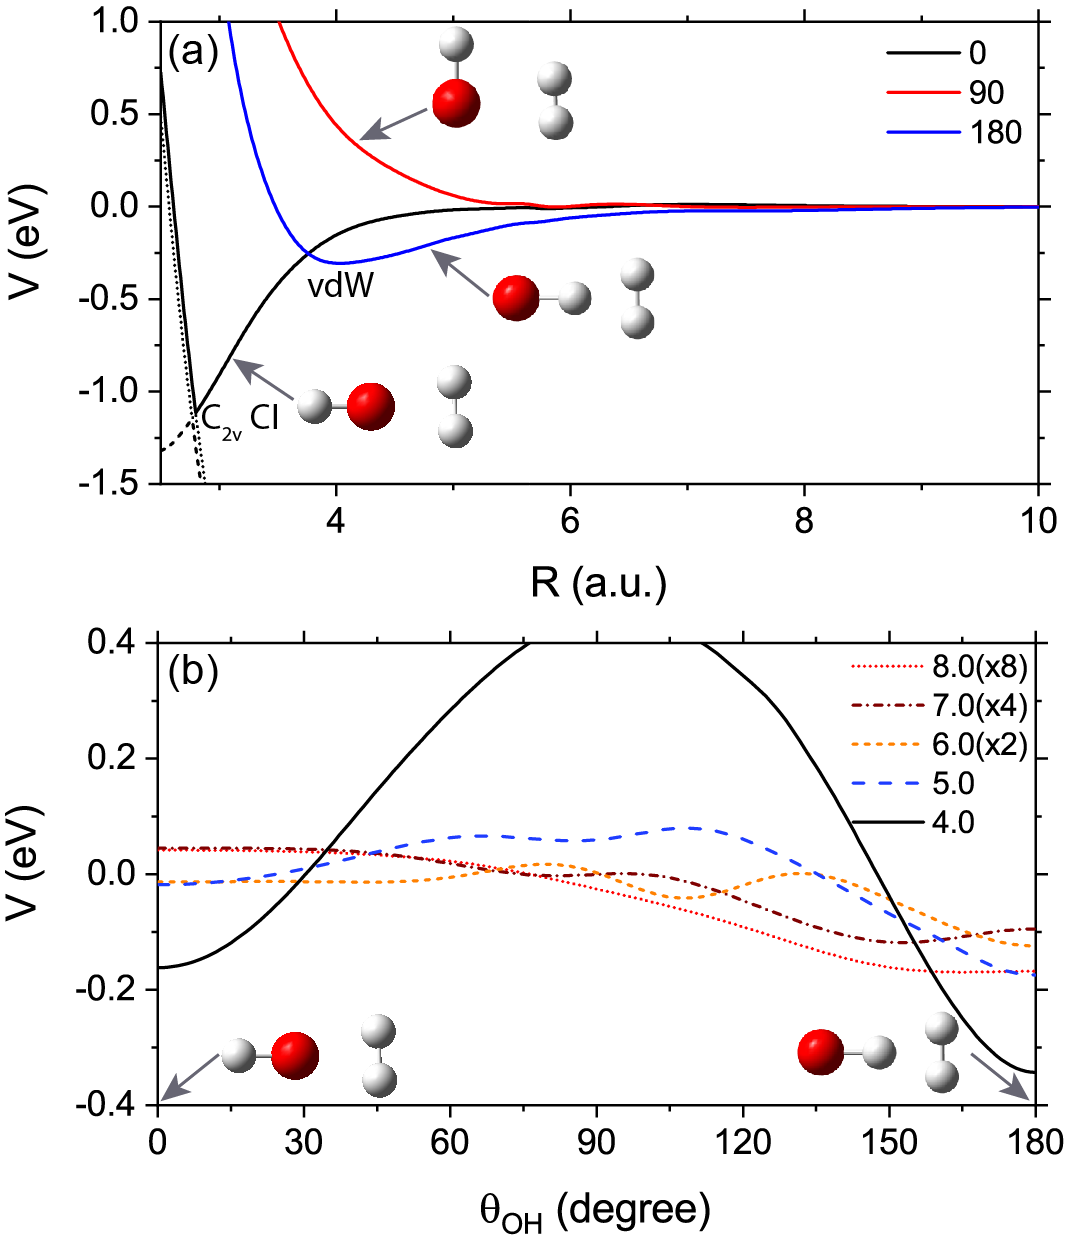


Figure S1. One-dimensional plots of the adiabatic 32A state PES: (a) in the *R* coordinate for three OH orientations, i.e., =0, 90, and 180 degrees. H-H and O-H bond lengths are fixed at the equilibrium values. The dashed and dotted lines show the C2v CI. (b) in the coordinate at different *R* values. The potential is relaxed with respect to H-H and O-H bond lengths. In both panels, and are fixed at 90° and 0, respectively,


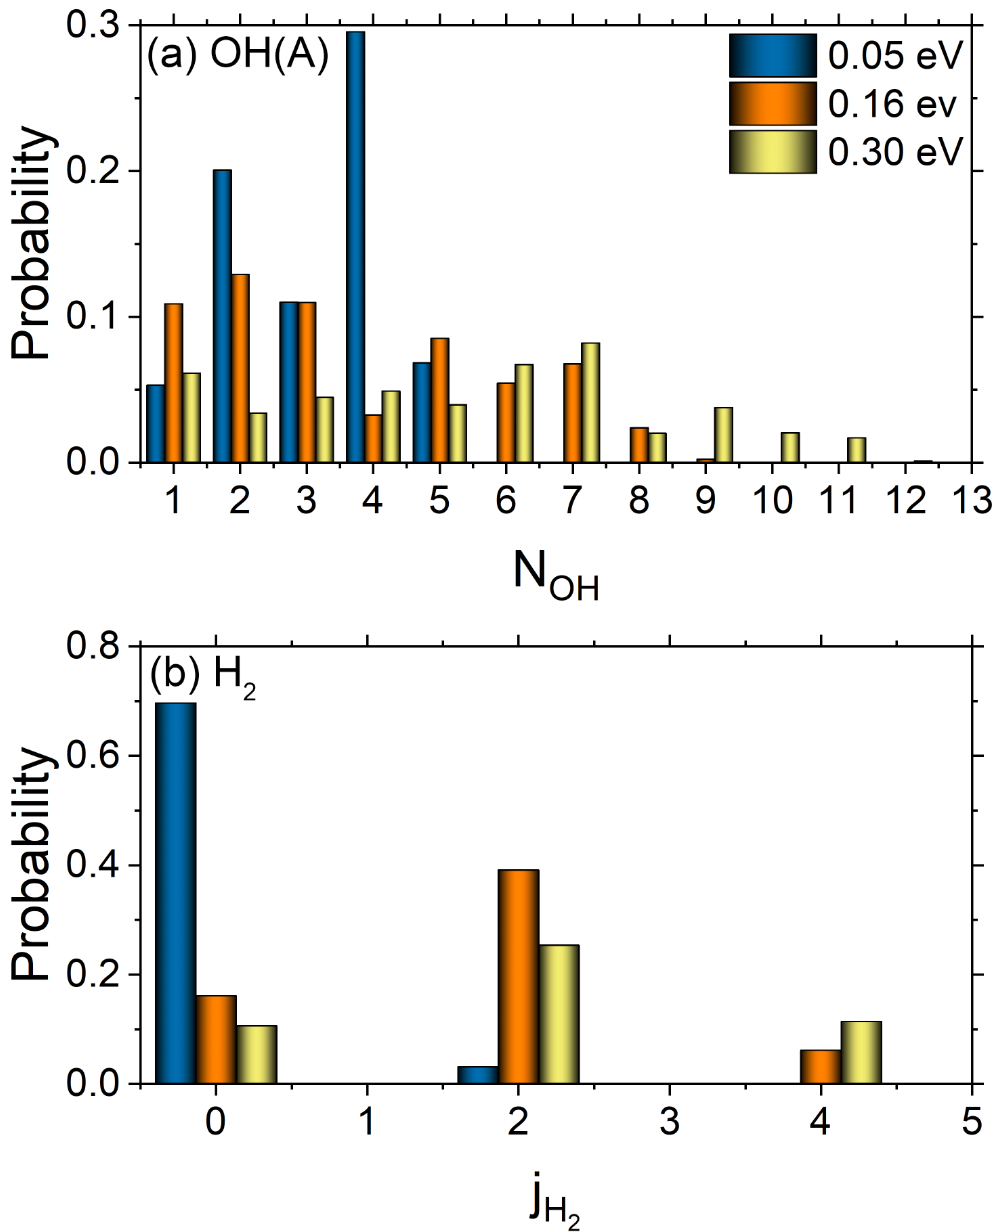


Figure S2. OH(A) and H2 rotational state-resolved probability in the (in)elastic channel at three collision energies. Both OH(A) and H2 have no vibrational excitation.


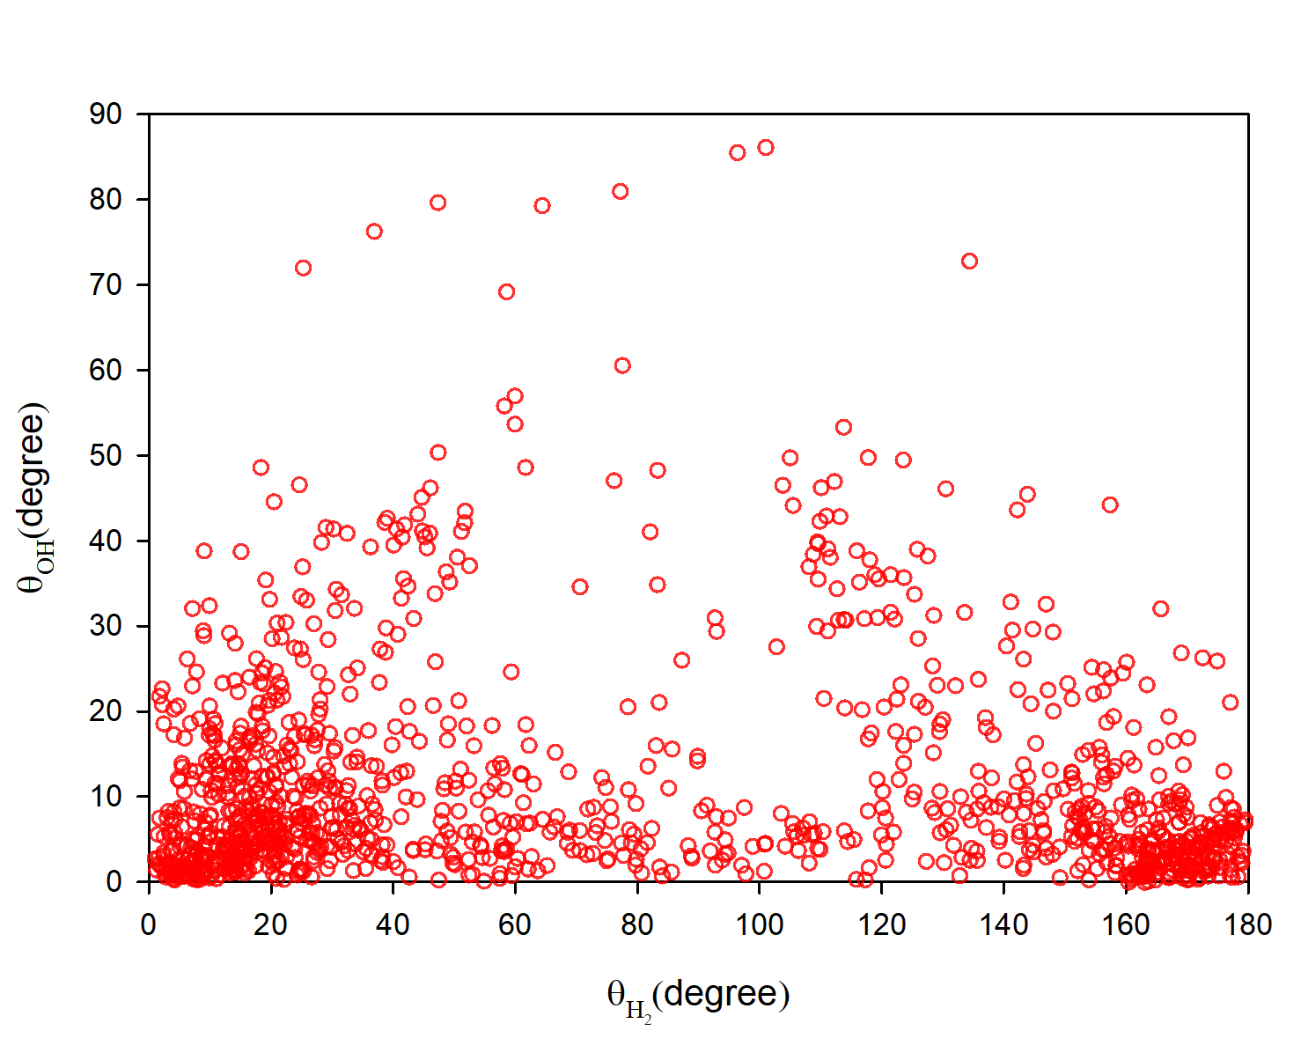


Figure S3. Distribution of the hopping geometry for the 32A-22A transitions in the TSH calculation at 0.05 eV.


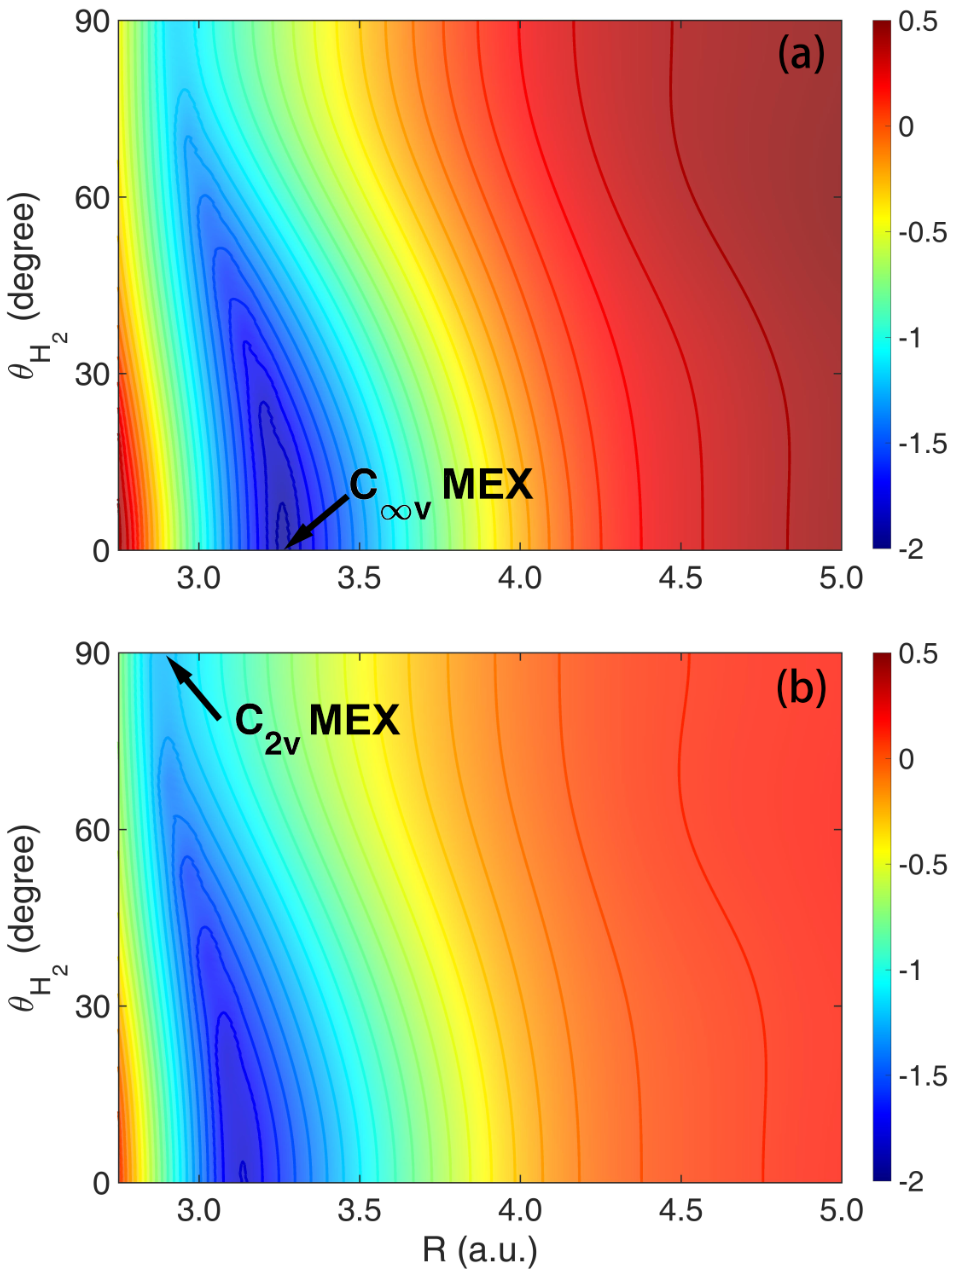


Figure S4. Two-dimensional cuts of the 32A adiabatic surface along *R* and . The reference geometry is chosen at (a) the C∞v and (b) the 22A-32A(C2v) MEXs (see Table S1).


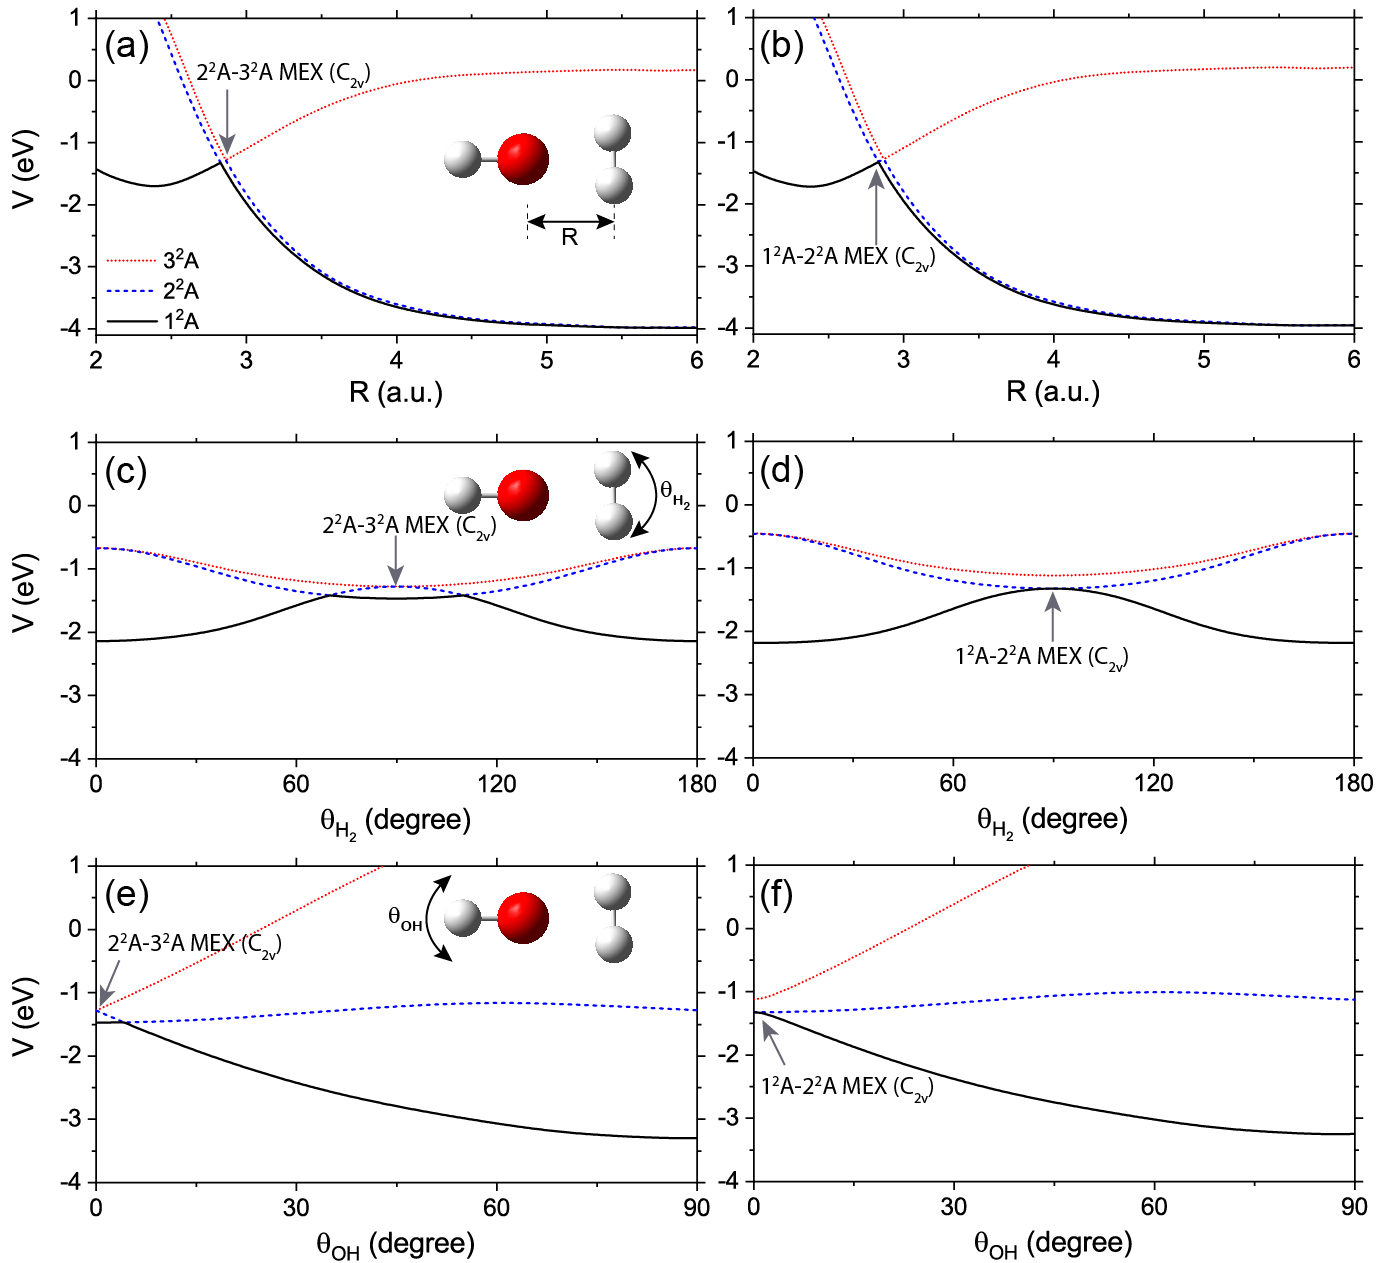


Figure S5. One-dimensional cuts of the adiabatic surfaces. The same as Figure 5 in the main text except that the reference geometries are chosen at the 22A-32A(C2v) and 12A-22A(C2v) MEXs (see Table S1).


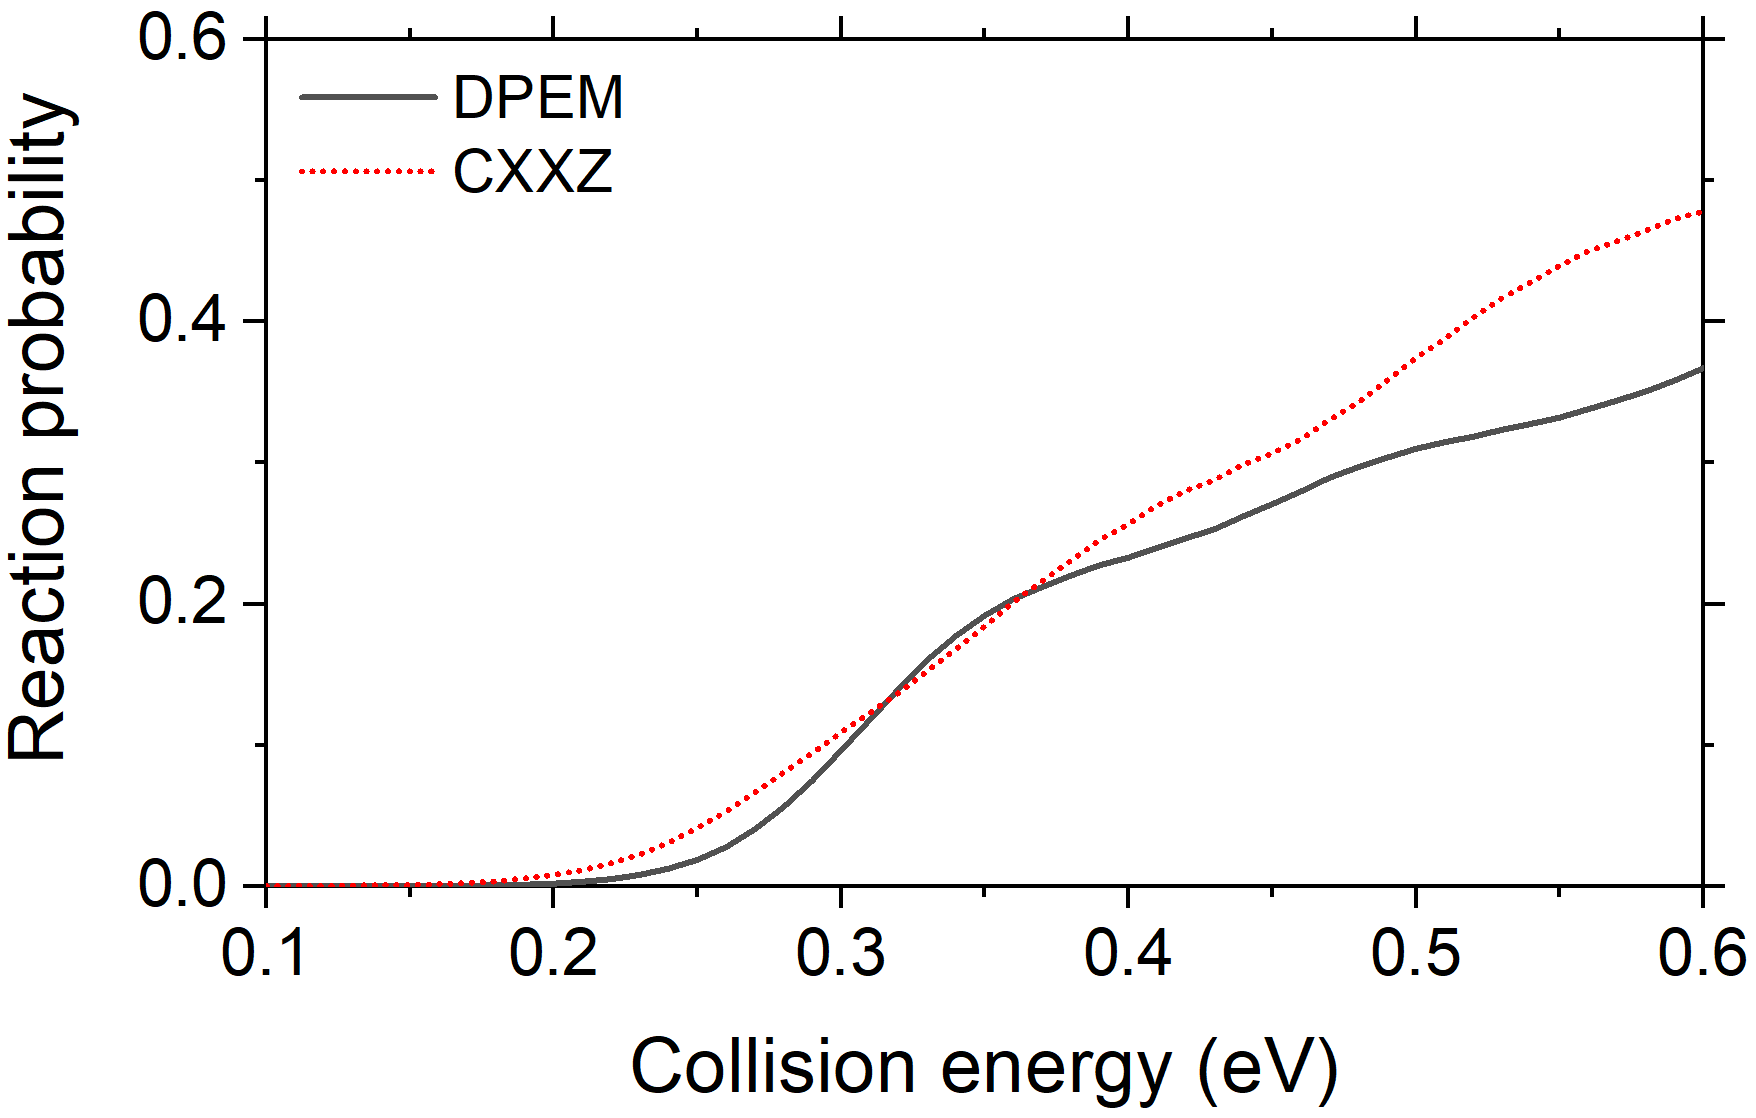


Figure S6. Reaction probability of the H2+OH reaction on the ground adiabatic state PES from the DPEM and the PES of Chen, Xu, Xu, and Zhang (CXXZ).[10](#_ENREF_10) Both H2 and OH are in the ground ro-vibrational state.


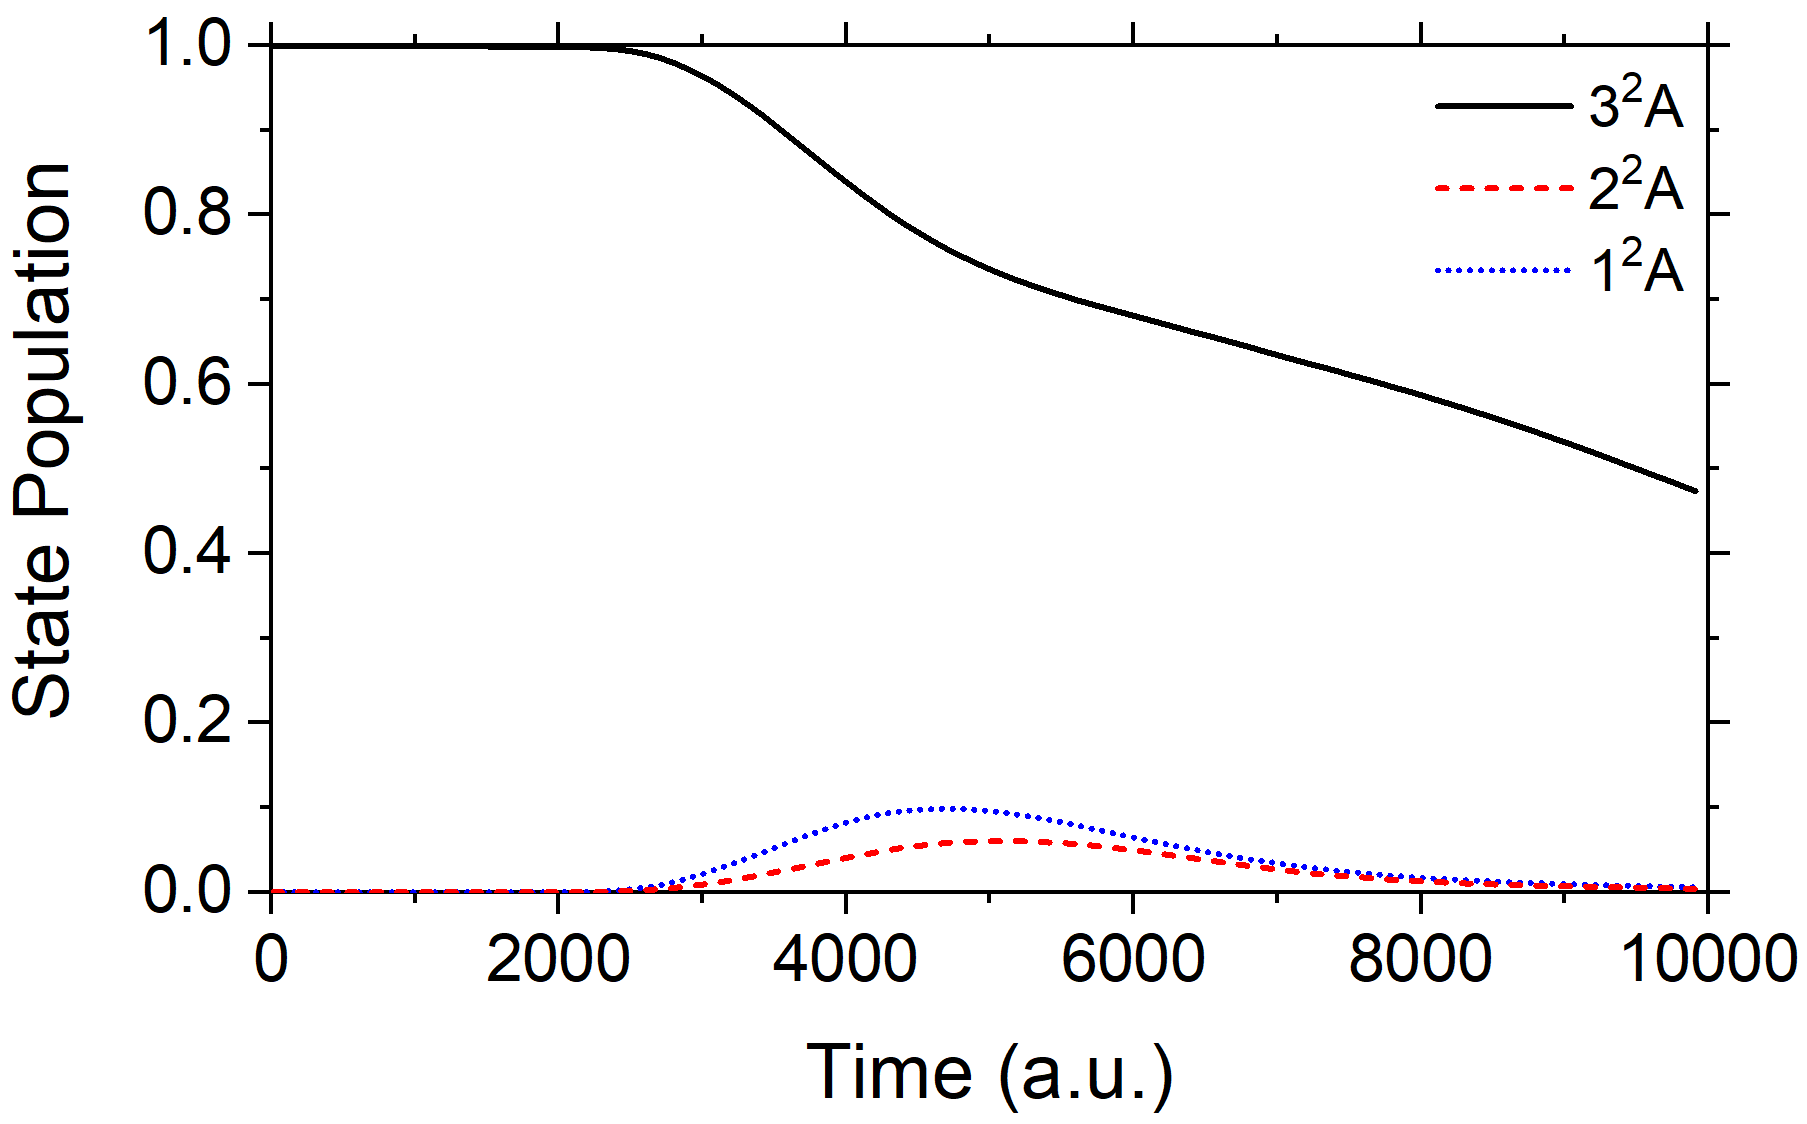


Figure S7. Adiabatic state populations of the 12A, 22A, and 32A state wave packets as a function of time. The final decay after 5000 au is due to the absorbing potentials.


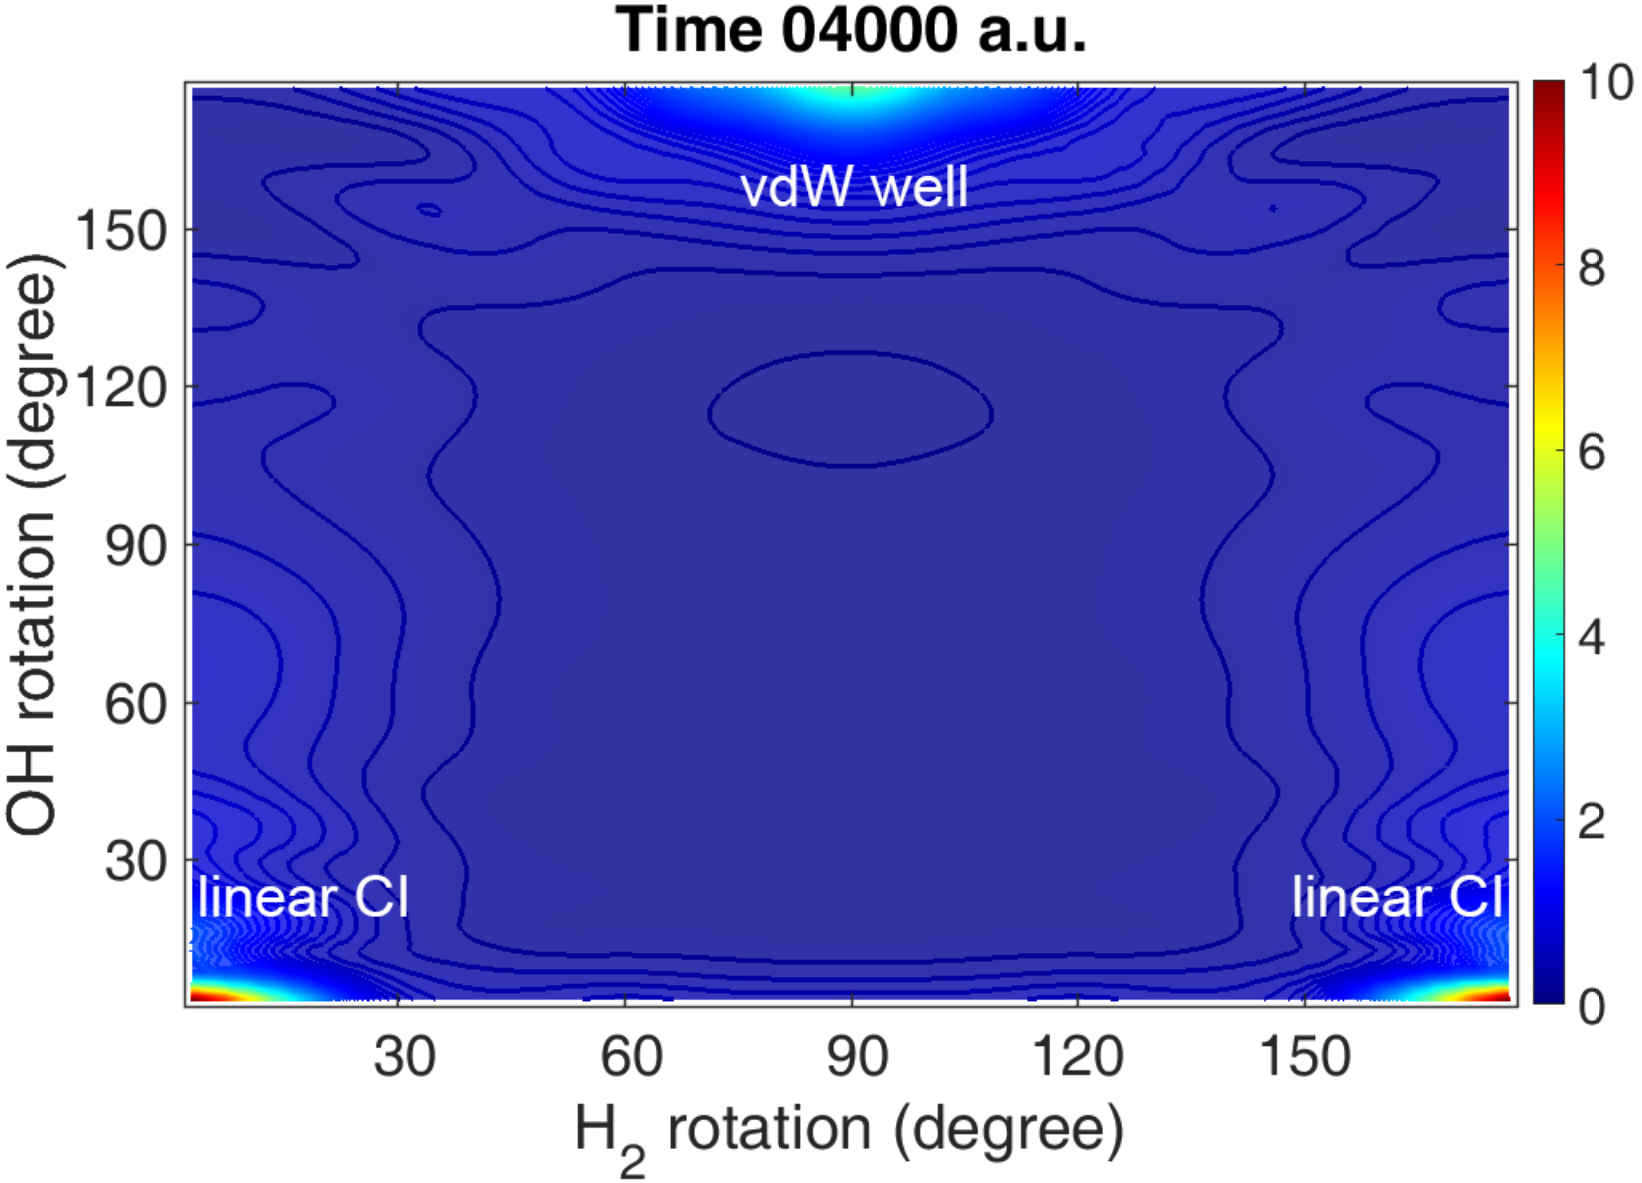


Figure S8. A snapshot of the Movie S3 at a propagation time of 4, 000 a.u.: 2D plots of the probability density of the wave packet on the initial OH(A2+)+OH state PES.

**References:**

1. Zhao, B.; Sun, Z.; Guo, H., A reactant-coordinate-based approach to state-to-state differential cross sections for tetratomic reactions. *J. Chem. Phys.* **2016,** *145* (18), 184106.

2. Light, J. C.; Carrington Jr., T., Discrete-variable representations and their utilization. *Adv. Chem. Phys.* **2000,** *114*, 263-310.

3. Kosloff, R., Time-dependent quantum-mechanical methods for molecular dynamics. *J. Phys. Chem.* **1988,** *92* (8), 2087-2100.

4. Zheng, J.; Li, Z.-H.; Jasper, A. W.; Bonhommeau, D. A.; Valero, R.; Meana-Pañeda, R.; Mielke, S. L.; Truhlar, D. G. *ANT*, University of Minnesota, Minneapolis: 2016.

5. Tully, J. C., Molecular dynamics with electronic transitions. *J. Chem. Phys.* **1990,** *93*, 1061-1071.

6. Jasper, A. W.; Stechmann, S. N.; Truhlar, D. G., Fewest-switches with time uncertainty: A modified trajectory surface-hopping algorithm with better accuracy for classically forbidden electronic transitions. *J. Chem. Phys.* **2002,** *116* (13), 5424-5431.

7. Jasper, A. W.; Truhlar, D. G., Non-Born-Oppenheimer molecular dynamics of Na⋯FH photodissociation. *J. Chem. Phys.* **2007,** *127* (19), 194306.

8. Malbon, C. L.; Zhao, B.; Guo, H.; Yarkony, D. R., On the nonadiabatic collisional quenching of OH(A) by H2: a four coupled quasi-diabatic state description. *Phys. Chem. Chem. Phys.* **2020,** *22* (24), 13516-13527.

9. Dempsey, L. P.; Murray, C.; Cleary, P. A.; Lester, M. I., Electronic quenching of OH A 2Σ+ radicals in single collision events with H2 and D2: a comprehensive quantum state distribution of the OH X 2Π products. *Phys. Chem. Chem. Phys.* **2008,** *10* (10), 1424-1432.

10. Chen, J.; Xu, X.; Xu, X.; Zhang, D. H., A global potential energy surface for the H2 + OH ↔ H2O + H reaction using neural networks. *J. Chem. Phys.* **2013,** *138* (15), 154301.
